# The recovery of plant community composition following passive restoration across spatial scales

**Authors:** Emma Ladouceur<sup>1,2,3,4\*</sup>, Forest Isbell<sup>5</sup>, Adam T. Clark<sup>6</sup>, W. Stanley Harpole<sup>1,4,7</sup>, Peter B. Reich<sup>8,9,10</sup>, G. David Tilman<sup>5,11</sup>, Jonathan M. Chase<sup>1,3,7</sup>

<sup>1</sup> The German Centre for Integrative Biodiversity Research (iDiv) Halle-Leipzig-Jena, Puschstraße 4, 04103 Leipzig, Germany

<sup>2</sup> Department of Biology, University of Leipzig, Germany

<sup>3</sup> Institute of Computer Science, Martin Luther University Halle-Wittenberg, 06120 Halle (Saale), Germany.

<sup>4</sup> Department of Physiological Diversity, Helmholtz Centre for Environmental Research -UFZ, Permoserstrasse 15, 04318 Leipzig, Germany.

<sup>5</sup> Department of Ecology, Evolution and Behaviour, University of Minnesota, 1479 Gortner Avenue, 512 Ecology Building, Saint Paul, MN 55108, USA

<sup>6</sup> Institute of Biology, Karl-Franzens University of Graz, Styria, Austria

<sup>7</sup> Institute of Biology, Martin Luther University Halle- Wittenberg, Am Kirchtor 1, Halle (Saale) 06108, Germany

<sup>8</sup> Department of Forest Resources, University of Minnesota, 1530 Cleveland Avenue North, St Paul, Minnesota, 55108, USA

<sup>9</sup> Institute for Global Change Biology, School for Environment and Sustainability, University of Michigan, Ann Arbor, Michigan, USA

<sup>10</sup> Hawkesbury Institute for the Environment, Western Sydney University, Penrith, New South Wales, Australia

<sup>11</sup> Bren School of Environmental Science and Management, University of California, Santa Barbara, 2400 Bren Hall, Santa Barbara, CA 93106, USA

\* **Corresponding Author:** The German Centre for Integrative Biodiversity Research (iDiv) Halle-Leipzig-Jena, Puschstraße 4, 04103 Leipzig, [emma.ladouceur@idiv.de](mailto:emma.ladouceur@idiv.de)

**Keywords:** biodiversity, chronosequence, old fields, regeneration, restoration, scale-dependence, succession

Word count (main text and figure captions): 6338

**Keywords:** biodiversity, chronosequence, old fields, regeneration, restoration, scale-dependence, succession, global change ecology

## Abstract

1. Human impacts have led to dramatic biodiversity change which can be highly scale-dependent across space and time. A primary means to manage these changes is via passive (here, the removal of disturbance) or active (management interventions) ecological restoration. The recovery of biodiversity, following the removal of disturbance is often incomplete relative to some kind of reference target. The magnitude of recovery of ecological systems following disturbance depend on the landscape matrix,

45 as well as the temporal and spatial scales at which biodiversity is  
46 measured.

47 2. We measured the recovery of biodiversity and species composition over  
48 27 years in 17 temperate grasslands abandoned after agriculture at  
49 different points in time, collectively forming a chronosequence since  
50 abandonment from one to eighty years. We compare these abandoned  
51 sites with known agricultural land-use histories to never-disturbed sites as  
52 relative benchmarks. We specifically measured aspects of diversity at the  
53 local plot-scale ( $\alpha$ -scale, 0.5m<sup>2</sup>) and site-scale ( $\gamma$ -scale, 10m<sup>2</sup>), as well as  
54 the within-site heterogeneity ( $\beta$ -diversity) and among-site variation in  
55 species composition (turnover and nestedness).

56 3. At our  $\alpha$ -scale, sites recovering after agricultural abandonment only had  
57 70% of the plant species richness (and ~30% of the evenness), compared  
58 to never-ploughed sites. Within-site  $\beta$ -diversity recovered following  
59 agricultural abandonment to around 90% after 80 years. This effect,  
60 however, was not enough to lead to recovery at our  $\gamma$ -scale. Richness in  
61 recovering sites was ~65% of that in remnant never-ploughed sites. The  
62 presence of species characteristic of the never disturbed sites increased in  
63 the recovering sites through time. Forb and legume cover declines in years  
64 since abandonment, relative to graminoid cover across sites.

65 4. **Synthesis.** We found that, during the 80 years after agricultural  
66 abandonment, old-fields did not recover to the level of biodiversity in  
67 remnant never-ploughed sites at any scale.  $\beta$ -diversity recovered more  
68 than  $\alpha$ -scale or  $\gamma$ -scales. Plant species composition recovered, but not  
69 completely, over time, and some species groups increased their cover  
70 more than others. Patterns of ecological recovery in degraded ecosystems  
71 across space and long time-scales can inform effective, targeted active  
72 restoration interventions and perhaps, lead to better outcomes.

73

## 74 Introduction

75 The Anthropocene is characterised by dramatic impacts of people on the  
76 biosphere, via a number of direct and indirect processes (e.g., land use, climate  
77 change), often leading to altered numbers and types of species (i.e., biodiversity) in  
78 those impacted ecosystems (Díaz et al., 2019; Newbold et al., 2015). While a primary  
79 means to manage these changes is to reduce the extent and intensity of negative  
80 drivers of biodiversity change (e.g., reduced destruction or degradation of natural  
81 ecosystems), an increasingly important way to recover losses of biodiversity and the

82 ecosystem services it provides is via a cessation or reduction of the impacts and  
83 restoration of those ecosystems (Jones et al., 2018). The United Nations has recently  
84 announced 2021-2030 as the Decade on Ecosystem Restoration, with the goal of  
85 restoring 350 million hectares of degraded land to achieve higher biodiversity and  
86 ecosystem functions (UNEA, 2019).

87 Ecological restoration can take many forms. The Society for Ecological  
88 Restoration (SER) recognises a 'restorative continuum' of interventions that can help  
89 ecosystems recover to context-dependent benchmarks after disturbance (Gann et al.,  
90 2019). This can range from passive restoration, or natural recovery, which is the  
91 cessation of major disturbance (e.g., deforestation, agriculture) (Atkinson & Bonser,  
92 2020; Chazdon et al., 2021) or reinstatement of disturbance and management regimes  
93 (e.g., fire, grazing, mowing). Active, or assisted and reconstructive restoration,  
94 includes the addition of interventions which might manipulate abiotic and biotic  
95 factors including the reintroduction of desired biota (Atkinson & Bonser, 2020). Through  
96 successional processes or the assistance of such processes, such as  
97 recolonizations and extinctions, ecosystems can then recover on a trajectory towards  
98 a desirable functioning state (Shackelford, Dudley, et al., 2021; Temperton et al., 2004).  
99 However, this recovery is typically incomplete (Jones et al., 2018; Moreno-Mateos et al.,  
100 2017; Rey Benayas et al., 2009). In addition, communities in restored/recovered  
101 ecosystems are often composed of more generalist and alien species when  
102 compared to reference sites (Kaul & Wilsey, 2021). The composition of recovering  
103 sites at different time points can be tied to species life-history characteristics (Zirbel &  
104 Brudvig, 2020), can have interactive inhibitory or facilitative effects for other species to  
105 recolonise (Young et al., 2017), and can be influenced by the surrounding landscape,  
106 history, and management (Funk, 2021; Grman et al., 2015; Guiden et al., 2021).

107           Despite frequent studies on how biodiversity responds to anthropogenic  
108 impact and recovery (Murphy & Romanuk, 2014; Newbold et al., 2015), less attention  
109 has been paid to how inference of restoration on biodiversity depends on the  
110 ecological scale in which diversity is measured and observed (Catano et al., 2021;  
111 Martin et al., 2005). Nevertheless, most measures of biodiversity inherently depend on  
112 the spatial scale on which samples are taken (i.e., a 1m<sup>2</sup> quadrat compared to an  
113 entire site), and on the temporal scales which are measured (i.e., a year or a  
114 decade) (Matthews et al., 2021; Rosenzweig, 1995). As a result, scale can critically  
115 influence the magnitude in which biodiversity changes are quantified, even when  
116 sample effort is standardised (Chase et al., 2018; Chase & Knight, 2013; Field et al.,  
117 2009; Hill & Hamer, 2004; Sax & Gaines, 2003).

118           While the scale-dependence of biodiversity responses to anthropogenic  
119 activities are well known, the direction of scale dependence is less clear. Scale-  
120 dependent biodiversity responses to anthropogenic activities are most often studied  
121 in the context of changes to  $\beta$ -diversity, or the site differences in species composition  
122 (Chase et al., 2019; Socolar et al., 2016). Often, anthropogenic activities are thought to  
123 create a homogenising effect, reducing  $\beta$ -diversity (Gossner et al., 2016; Hautier et al.,  
124 2018; Martin et al., 2005). When  $\beta$  diversity is reduced by an anthropogenic driver, this  
125 can lead to cases where small to moderate effects of a driver at smaller scales (i.e.,  
126  $\alpha$ -diversity) can become exacerbated at larger spatial scales. For example, (W. Li et  
127 al., 2021) found that Mongolian semiarid grassland communities that were impacted  
128 by grazing and mowing had fewer species in each locality ( $\alpha$ -diversity) as  
129 disturbance intensity increased. However, because more narrowly distributed  
130 species were more strongly influenced by disturbance intensities than more

131 widespread species,  $\beta$ -diversity also decreased, and the effect at the larger ( $\gamma$ -  
132 diversity) spatial scale was greater.

133         On the other hand, anthropogenic activities can lead to communities  
134 becoming more different between sites (higher  $\beta$ -diversity), which can lead to cases  
135 where relatively larger effects of a driver occur at smaller spatial scales (i.e.,  $\alpha$ -  
136 diversity). These negative effects weaken as scale increases (i.e.,  $\gamma$ -diversity). For  
137 example, (Uchida et al., 2018) found that land abandonment in Japanese semi-natural  
138 grasslands led to a reduction in small-scale species richness when compared to  
139 intensive agriculture and traditional management practices, but this negative effect  
140 sometimes dissipated as scale increased. Likewise, semi-natural grassland  
141 communities in the Slovak Republic had lower  $\alpha$ -diversity, but an increase in  $\beta$ -  
142 diversity and  $\gamma$ -diversity in landscapes with a higher proportion of non-natural  
143 habitats (Janišová et al., 2014). There are many underlying factors that can influence  
144 the direction and magnitude of scale-dependence resulting from anthropogenic  
145 drivers, with numerous examples supporting each (Chase et al. 2018, 2019).

146         Spatial scale can influence our understanding of how biodiversity recovers  
147 following cessation of major disturbance. For example, small-scale ( $\alpha$ ) diversity  
148 usually does not fully recover to pre-disturbance levels even under active restoration  
149 (Isbell et al., 2019; Moreno-Mateos et al., 2017; Rey Benayas et al., 2009). What is less  
150 clear, however, is how  $\beta$  and  $\gamma$ -diversity respond during recovery. If  $\beta$ -diversity is not  
151 influenced by the removal of disturbance and does not increase through time, the  
152 incomplete recovery of diversity following restoration would be equivalent at both  $\alpha$   
153 (within-plot) and  $\gamma$  (site) scales. If  $\beta$ -diversity is reduced by removal of disturbance  
154 (i.e., via homogenization) and does not recover during restoration, the incomplete  
155 recovery of  $\alpha$  diversity would be exacerbated at larger ( $\gamma$ ) scales. Finally, if  $\beta$ -

156 diversity increases following removal of the disturbance, incomplete recovery of  $\alpha$   
157 diversity could be accompanied by a more complete recovery of diversity at larger  
158 spatial scales. To date, few studies have examined the influence of recovery and  
159 restoration on the scale-dependence of biodiversity and  $\beta$ -diversity in particular, and  
160 those that have measured  $\beta$ -diversity do so in a number of different, often non-  
161 comparable, ways. There is some evidence that  $\beta$ -diversity and  $\gamma$ -diversity recover  
162 even less than  $\alpha$ -diversity (Martin et al., 2005; Passy & Blanchet, 2007; Polley et al., 2005;  
163 Wilsey et al., 2005). In a meta-analysis of grassland studies, however, (Catano et al.,  
164 2017) showed that the effects of disturbance can lead to homogenization (lower  $\beta$ -  
165 diversity) or differentiation (higher  $\beta$ -diversity) depending on the effects of  
166 disturbance on stochastic factors and dispersal rates. Furthermore,  $\beta$ -diversity can  
167 be enhanced in restoration, for example, when restoration actively targets  $\beta$ -diversity  
168 via larger species pools (Grman & Brudvig, 2014).

169         While there is evidence of deficits of  $\alpha$ ,  $\beta$  and  $\gamma$ -diversity in passively  
170 recovering and actively restored ecosystems, and in grassland systems in particular  
171 (Martin et al., 2005; Polley et al., 2005; Sluis, 2002), it remains unclear how long these  
172 potential deficits manifest on the landscape. Grasslands are one of the most  
173 endangered and least protected biomes globally (Hoekstra et al., 2004), and are  
174 experiencing extreme levels of land use change locally and regionally (Carbutt et al.,  
175 2017; Roch & Jaeger, 2014). There are few old growth and continuous tracts of  
176 grassland left (Nerlekar & Veldman, 2020; Scholtz & Twidwell, 2022). Here, we take  
177 advantage of long-term surveys of vegetation in remnant savannah prairies and  
178 recovering grasslands at the Cedar Creek Ecosystem Science Reserve in Minnesota  
179 (USA). Isbell et al. (2019) used data from remnant prairies and a 37-year survey of  
180 old-fields with different amounts of time since agricultural abandonment (ranging

181 from 1 to 91 years) to examine how  $\alpha$ -scale (within-plot) species richness, species  
182 diversity, evenness and productivity recovered (measured in 0.3 m<sup>2</sup> plots). They  
183 found that even after more than 91 years since abandonment of agriculture, species  
184 richness only recovered to 75% of its value in the reference site that was never-  
185 ploughed. However, because species richness is a scale-dependent metric, it is  
186 unclear how larger scale diversity recovered. Using the same system, and some, but  
187 not all of the same sampling as Isbell et al. (2019), and taking different spatial scales  
188 explicitly into account, we asked the following: (1) how do larger scale measures of  
189 diversity (i.e.,  $\beta$  and  $\gamma$ -diversity) vary through time across the chronosequence  
190 following agricultural abandonment and how do they compare to the smaller scale  
191 ( $\alpha$ ) measures? (2) How do measures of diversity other than species richness, such  
192 as those that incorporate evenness, respond at the  $\alpha$ ,  $\beta$  and  $\gamma$ -scales? (3) How has  
193 species composition, as a different component of recovery compared to measures of  
194 richness and diversity, responded through time? (4) How has the cover of species  
195 with different growth forms and life histories responded through time?

196

197

## 198 **Methods**

### 199 **Study system**

200 Cedar Creek Ecosystem Science Reserve, hereafter referred to simply as  
201 Cedar Creek, is a 2,200-hectare long-term ecological science reserve (LTER) run by  
202 the University of Minnesota (USA) in cooperation with the Minnesota Academy of  
203 Science located 50 km north of Minneapolis. Cedar Creek lies on a glacial outwash  
204 sand plain, between deciduous forest to the east and prairie to the west, forming a

205 mosaic of oak savanna, prairie, upland deciduous forest, lowland marshes and  
206 swamps (Inouye et al., 1987). Soils are largely outwash sediments of fine and medium  
207 sands, poor in nitrogen, which was further depleted by agricultural practices in old  
208 field sites (Inouye et al., 1987).

209         Agricultural land use in this area began after 1900, but aerial photography  
210 suggests some areas were never cleared (MHAPO, 2015; Pierce, 1954). As a result,  
211 there are now a series of agricultural sites (old-fields) abandoned at different times  
212 during the last century under passive recovery, as well as never-ploughed remnant  
213 prairies and savannas scattered across the reserve (Fig. S1, Table S1). Secondary  
214 succession in the abandoned old-fields is significantly limited by nitrogen (Tilman,  
215 1987), and dispersal limitation (Tilman, 1994). While fire does play a key role in  
216 maintaining prairies and savannas, succession does not consistently lead to  
217 afforestation in the absence of fire (Clark et al., 2019). The natural history of Cedar  
218 Creek is described in more detail in (Inouye et al., 1987).

219

## 220 **Study design and sampling**

221         We analysed vegetation from several sites that were part of long-term  
222 research at the Cedar Creek Ecosystem Science Reserve (Fig. S1). Specifically, we  
223 used data from otherwise comparable sites that could be categorised into two states  
224 (see Table S1 for details): (1) Never-ploughed sites, which included 18 upland oak  
225 savannas (plots of “Experiment 133”); (2) recovery sites that included 17 old-fields  
226 which were ploughed and used for agriculture, but were abandoned so that natural  
227 succession and recovery of the vegetation could be followed (“Experiment 014”).  
228 Old-fields were abandoned between 1927 and 2015 (Clark et al., 2019). Each field  
229 was measured approximately 6 times, with ~5-6 year measurement intervals from



230 1983- 2010 (27 years). At the start of the surveys, old-fields ranged from 1 year  
231 since agricultural abandonment to 48 years (Table S1). All sampled sites were  
232 located on well-drained upland sands (Inouye et al., 1987).

233 For surveys in both experiments, plants were estimated using percent cover  
234 classes (“Experiment 133” ) and species-level percent cover (“Experiment 14”) in  
235 0.5 m<sup>2</sup> plots (1m x 0.5m). Cover classes are based on a modified Domin scale (1 =  
236 1%, 2 = 2-5%, 3 = 6-25%, 4 = 26-50%, 5 = 51-75%, and 6 = 76-100%). Cover in both  
237 studies could exceed 100%. In Experiment 133 (never-ploughed fields), four parallel  
238 50 m long transects were laid out within fire management block units within each  
239 field, 25 m apart, and 6 plots were placed every 10m along each transect, for a total  
240 of 24 plots in fields in most years. In Experiment 14 (old fields), four permanent  
241 parallel 40m long transects were laid in each field, 25 m apart, and 25 plots were  
242 placed every 1.5 m along each transect, totalling 100 plots per field.

243 We did not include plots from the never-ploughed sites that had also never  
244 been burned. This is because fire is a natural disturbance that maintains these  
245 systems, and woody encroachment ensues when there is human-induced fire  
246 suppression (Clark et al., 2019). Within the old-fields, we kept all plots surveyed in  
247 years before the first year of burning, or those that have not been burned to  
248 represent site recovery after abandonment before fire. We also did not include sites  
249 that contained many trees (Clark et al., 2019). Because sample effort was not equal  
250 between all of the sites in some years (e.g., 1999, 2011), we selected sites and years  
251 that had a minimum of 24 samples, and used 20 randomly selected survey plots  
252 from each site (site E14 was sub-sampled to match the minimum number of samples  
253 in site E133). We took the midpoint of each cover class (“Experiment 133”) to  
254 quantify percent cover of species, so that the summed cover of all species could

255 exceed 100%. Species cover relative to each plot's summed cover was quantified as  
256 a proportion.

257

## 258 **Calculating Within-Site Metrics of Diversity**

259 We examined how biodiversity recovered across scales by calculating and  
260 comparing multiple metrics of diversity at multiple scales between the never-  
261 ploughed and recovery treatments. We estimated diversity at two spatial scales: (i)  
262 the  $\alpha$ -scale, which was the diversity in a given 0.5m<sup>2</sup> plot in a given treatment and  
263 year, and (ii) the  $\gamma$ -scale, which here we define as the total diversity in 20 0.5m<sup>2</sup> of  
264 combined plots within a site and year. Note, here we simply use  $\alpha$  and  $\gamma$ -diversity to  
265 denote smaller and larger scales, and make no assumptions whether these scales  
266 correlate with any local or regional coexistence mechanisms. Finally, from these  $\alpha$   
267 and  $\gamma$  estimates, we calculate (iii) Whittaker's multiplicative  $\beta$ -diversity ( $\beta = \gamma/\alpha$ ,  
268 (Whittaker, 1972) to quantify plot-to-plot variation, or the heterogeneity of plots within  
269 sites at each time point. While the sampling approach was not designed to sample  
270 the range of variation in the whole site, the amount and the equal number of samples  
271 across sites allows an estimation of this variation. Additionally, we extrapolated  
272 expected species richness from the  $\gamma$ -scale across 50 samples (Chao et al., 2014).

273 At each observed spatial scale, we estimated two metrics of diversity: (i)  
274 species richness, which was simply the total number of species observed in a given  
275  $\alpha$ -plot or  $\gamma$ - site, and (ii) an estimate of diversity that more heavily weights common  
276 species, the probability of interspecific encounter (PIE). The PIE is the probability  
277 that two species sampled randomly from a community are of a different species  
278 (Hulbert, 1971), and higher values represent more even communities. For analyses,  
279 we transformed the PIE into an effective number of species ( $ENS_{PIE}$ ), that has the

280 same number of units as species richness using the proportion of each species (Jost,  
281 2006); this is equivalent to Simpson's inverse diversity index (Simpson, 1949; Williams,  
282 1964). By comparing results of species richness versus  $ENS_{PIE}$ , we can evaluate  
283 whether differences are more strongly influenced by rare species only (in which case  
284 species richness results should be different from  $ENS_{PIE}$  results), or by both rare and  
285 common species (in which case, results from both metrics would be more similar)  
286 (Smith & Wilson, 1996). At all scales, we standardized the cover to sum 100%. At the  
287  $\alpha$ -scale, we summed cover across all species, and at the  $\gamma$ -scale, we summed  
288 across all species and plots. We used this relative proportion to calculate  $ENS_{PIE}$  at  
289 all scales.

290

291

## 292 **Species composition**

293 The measures of biodiversity (species richness and  $ENS_{PIE}$ ) explored here  
294 across scales ( $\alpha$ ,  $\beta$ ,  $\gamma$ ) allow us to compare numbers and types of species from plots  
295 within a given site status (i.e., never-ploughed versus ploughed sites). They do not,  
296 however, allow us to quantify the difference in species composition between the  
297 sites. For example, many highly specialised prairie and savanna plants rarely  
298 establish in the early phase of old-field recovery, which instead is dominated by  
299 weedy species that are less frequently found in pristine sites (Inouye et al., 1987).

300 To quantify the difference in species composition between never-ploughed  
301 sites and recovering sites, we calculated Jaccard's dissimilarity index indicating the  
302 dissimilarity in species composition between site status (ranging from 0 to 1). We  
303 partitioned the difference between the turnover and nestedness components of  
304 Jaccard's index (Baselga, 2009; Baselga & Orme, 2012). These metrics are known to

305 be sensitive to pre-existing differences in alpha-diversity (Vellend et al., 2007).

306 Through the careful design of our approach, we avoid these issues.

307 We used a checklist approach to identify species present within old-fields and  
308 across fields that have never been ploughed. First, we compiled a checklist of all  
309 species present across all never-ploughed sites within every time point measured  
310 (1984, 1990, 1995, 2000, 2005, 2010) to determine the 'regional' species pool for the  
311 never-ploughed sites within each year, resulting in one 'regional checklist' for every  
312 year. This never-ploughed regional checklist represents a temporally accurate  
313 relative restoration reference target. Next, we compiled a checklist of all species  
314 present within every old-field site and time point measured (1983, 1989, 1994, 1997,  
315 2002, 2006), resulting in a checklist for every old field site and every year. If a  
316 species was present across multiple plots within a site, it was only represented once  
317 in the never-ploughed or old-field checklist with a presence of 1. We then compared  
318 species present in the checklist of every old-field site within each year to the regional  
319 checklist across all never-ploughed sites at the closest calendar year and nearest  
320 comparable time-point measured (eg. 1983 compared to 1984) as a single pairwise  
321 comparison (Marion et al., 2017). This quantifies the site-level compositional change of  
322 each old-field since agricultural abandonment relative to the total species present  
323 within all never-ploughed sites at the most comparable time-point as a consistent  
324 comparison benchmark. If species from the checklist of never-ploughed sites were  
325 recolonizing old-fields over time, we expect nestedness to increase in each old-field  
326 as years since agricultural abandonment progress. If species colonising old-field  
327 sites since abandonment are different from that of never-ploughed sites, then we  
328 would expect the turnover component to increase across time.

329           Lastly, to quantify changes in relative cover after years since agricultural  
330 abandonment, we calculated the relative cover of species broad growth form groups  
331 (graminoids, forbs, and legumes) and their origin (native, exotic) for every plot  
332 measured in every year.

333           We used the R Environment for Statistics and Computing (R Core Development  
334 Team, 2019) for all data preparation, manipulation, quantification of diversity metrics,  
335 statistical analysis and graphic visualisation of results. To quantify diversity metrics  
336 (e.g.,  $\alpha$ ,  $\beta$ ,  $\gamma$  species richness) we used tidyverse (Wickham et al., 2019) and vegan  
337 (e.g.,  $\alpha$ ,  $\beta$ ,  $\gamma$  ENS<sub>PIE</sub>) packages (Oksanen et al., 2019). For dissimilarity and its partition  
338 into turnover and nestedness, we used the beta.part package (Baselga & Orme, 2012;  
339 Oksanen et al., 2019). We used the iNEXT package (Chao et al., 2014; Hsieh, T.C. et al.,  
340 2020) to interpolate and extrapolate (up to 50 samples) species richness across  
341 scales based on average observed samples across each site status and year since  
342 agricultural abandonment (Fig. S2, S3).

343

#### 344 **Statistical analysis**

345           We quantified field status (old-field vs never-ploughed) effects on biodiversity  
346 using hierarchical linear models (Discrete analysis) with site status (i.e., old-field or  
347 never-ploughed) as a categorical fixed effect. We modelled site and calendar year as  
348 random effects, and allowed random intercepts to vary (Supplementary Information  
349 Table S2, Fig. S4-S9 for all model details).

350           The effect of years of agricultural abandonment on the recovery of old-fields  
351 compared to the never-ploughed sites at each scale of diversity were quantified  
352 using hierarchical linear models (continuous analysis). Year since agricultural  
353 abandonment was modelled as a continuous fixed effect and was log-transformed.

354 We found logarithmic trends to be the most parsimonious for statistical models  
355 looking at diversity (e.g.  $\alpha$ ,  $\beta$ ,  $\gamma$ , richness and  $ENS_{PIE}$ ) as a function of years since  
356 abandonment, similar to previous work (Isbell et al., 2019). At both spatial scales, we  
357 quantified each log-transformed diversity component in old-fields as the percentage  
358 compared to the mean of the never-ploughed sites at that same metric and scale.  
359 We allowed random intercepts and slopes to vary for years since agricultural  
360 abandonment, and for categorical calendar year, assuming variation between each  
361 site, the year it was abandoned and the calendar year sampling started  
362 (Supplementary Information for all model details). For the  $\alpha$ -scale, we modelled plot  
363 nested within transect, nested within site as random effects and for  $\beta$  and  $\gamma$ -scales,  
364 site as a random effect. We plotted log-transformed trends on a linear scale, which is  
365 why the visualisation of the overall trends have some curvature.

366 We quantified the year of abandonment effects on the turnover and  
367 nestedness components of Jaccard's dissimilarity using two univariate hierarchical  
368 linear models (dissimilarity analysis). We modelled the year since abandonment as a  
369 continuous fixed effect and site as a random effect. We allowed random intercepts  
370 and slopes to vary for years since agricultural abandonment, for every old field and  
371 for calendar year, assuming there was variation in each site and each year of  
372 sampling

373 We quantified the effect of years since agricultural abandonment on the  
374 relative cover of growth forms (graminoid, forb, legume) and their origin (native and  
375 introduced) using a univariate hierarchical linear model. We modelled the year since  
376 abandonment as a continuous fixed effect (log-transformed), including growth form  
377 and origin and their 3-way-interaction as categorical fixed effects. We log-  
378 transformed relative percent cover and allowed random intercepts and slopes to vary

379 for all fixed effects across every site, and year. We plotted log responses on a linear  
380 scale.

381 For Bayesian inference and estimates of uncertainty, we fit models using the  
382 Hamiltonian Monte Carlo (HMC) sampler Stan (Carpenter et al., 2017), and coded  
383 using the brms package (Bürkner, 2018). We fit all models with four chains, differing  
384 iterations, and differing assumed distributions (See Supplementary Information for all  
385 model details). We used weakly regularising priors and visual inspection of the HMC  
386 chains showed excellent convergence.

387

## 388 **Results**

### 389 **$\alpha$ -scale and $\gamma$ -scale species richness**

390 For the discrete analysis (Figs 1 a, b), we found that, old-field plots had on  
391 average 59% of species richness (5.65, 95% credible interval: 4.66 to 6.56) found in  
392 never-ploughed sites (9.59, CI: 8.70 to 10.51, Fig. 1a) at the  $\alpha$ -scale (0.5 m<sup>2</sup>) and  
393 approximately 55% fewer species (23.6, 21.2 to 26.1) than never-ploughed sites  
394 (42.6, 38.6 to 47.1, Fig. 1b) at the  $\gamma$ -scale (the combination of 20 plots and thus  
395 10m<sup>2</sup>). We found a similar difference between old-fields and never-ploughed sites  
396 when we extrapolated species richness estimates based on incidence-based species  
397 accumulation to 50 samples (Figs S2, S3).

398 In the continuous analysis (Figs 1 c, d), richness weakly increased across  
399 years since agricultural abandonment at the  $\alpha$ -scale, but with high uncertainty  
400 (Slope: 0.13, 95% credible interval: -0.17 to 0.53, Fig. 1c). After ~80 years since  
401 abandonment,  $\alpha$ -scale species richness in old-fields was about 70% of that found in  
402 never-ploughed sites. At the  $\gamma$ -scale, grassland species richness increased across

403 years since agricultural abandonment (Fig. 1d), but again with high uncertainty  
 404 (Slope: 0.13, CI: -0.11 to 0.40).  $\gamma$ -scale richness in old-fields was about 65% of that  
 405 found in never-ploughed sites after 80 years.

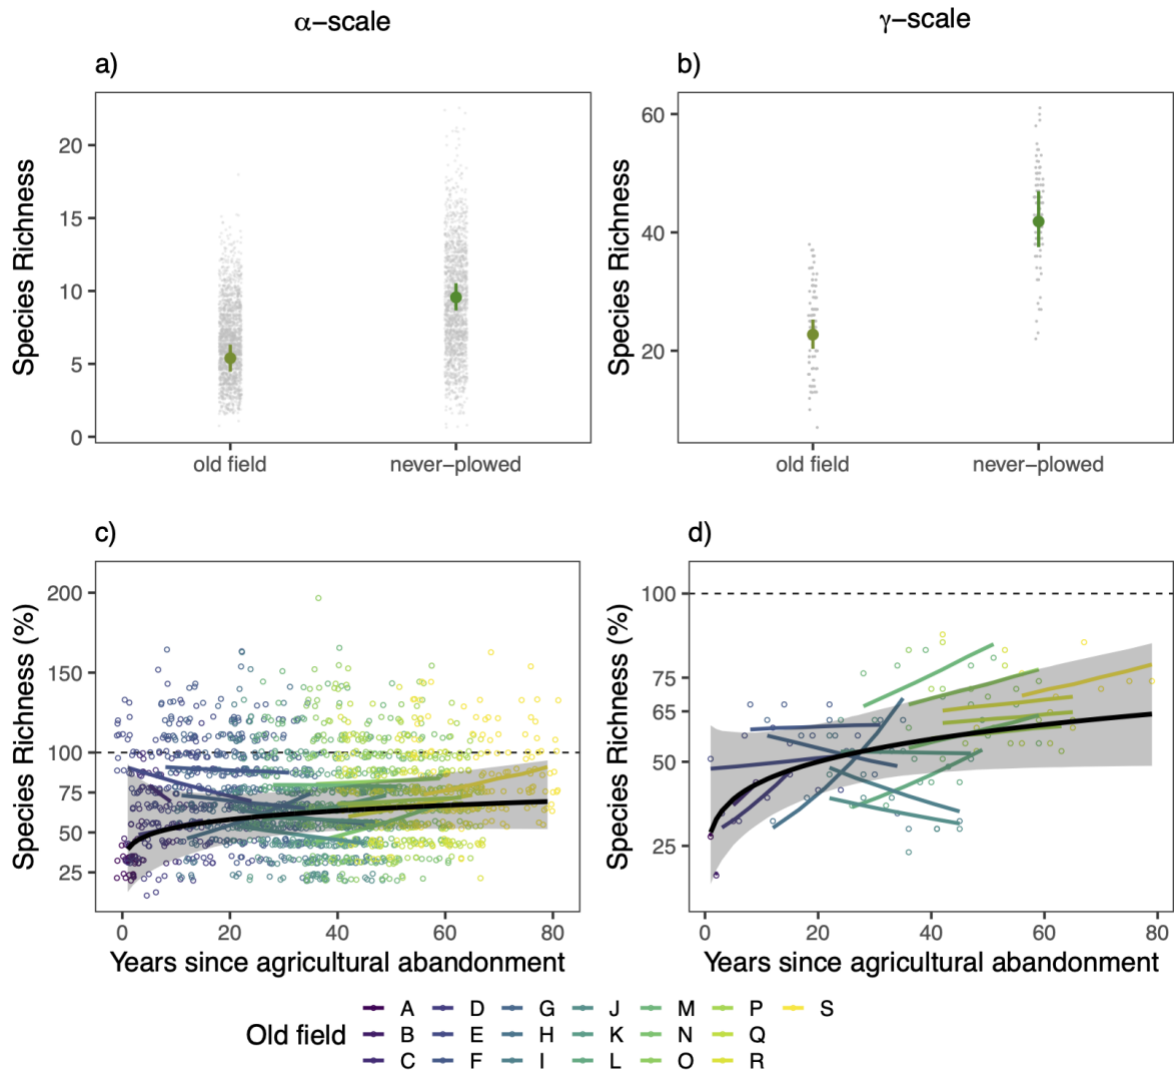

406

407 **Figure 1:  $\alpha$ -scale and  $\gamma$ -scale species richness.** a)  $\alpha$ -scale and b)  $\gamma$ -scale  
 408 species richness as a function of site status. Small points show data models were fit  
 409 to; large points are the conditional effects of site status and the lines show the 95%  
 410 credible intervals of conditional effects. c)  $\alpha$ -scale and d)  $\gamma$ -scale species richness as  
 411 a function of 'years since agricultural abandonment'. Black dashed line represents  
 412 the mean diversity metric of all never-ploughed sites (18 sites). The thick black line  
 413 represents the average effect of years since agricultural abandonment on species  
 414 richness across all old-fields. The grey shading around the black line represents the  
 415 95% credible interval of that effect estimate. Each colored line represents the



416 average predicted values for each site. Each open point represents an old-field plot  
417 ( $\alpha$ -scale) or a site ( $\gamma$ -scale) calculated as the percentage of richness, compared to  
418 never-ploughed sites. Y-axes vary for clarity.

419

#### 420 **$\alpha$ -scale and $\gamma$ -scale ENS<sub>PIE</sub>**

421 In discrete analysis (top row) at the  $\alpha$ -scale, old-field sites overall had  
422 approximately 31% of ENS<sub>PIE</sub> (2.27, 1.66 to 2.89) (relative abundance was less  
423 even) found in never-ploughed sites (7.21, 6.62 to 7.82, Fig. 2a). At the  $\gamma$ -scale, old-  
424 field sites had approximately 28% (3.53, 2.14 to 4.88) fewer species equivalents than  
425 in never-ploughed sites (12.61, 11.27 to 14.02, Fig. 2b).

426 At the  $\alpha$ -scale, ENS<sub>PIE</sub> does not increase strongly across years since  
427 agricultural abandonment (Slope: 0.07, 95% Credible Intervals: -0.14 to 0.37, Fig.  
428 2c). After ~ 80 years,  $\alpha$ -scale plots within old-fields have less than 50% ENS<sub>PIE</sub> than  
429 those that were never disturbed. At the  $\gamma$ -scale, ENS<sub>PIE</sub> weakly increases across  
430 years since agricultural abandonment with high uncertainty (Slope: 0.15, CI: -0.08 to  
431 0.36, Fig. 2d), and had less than 50% ENS<sub>PIE</sub> than the never-ploughed sites after 80  
432 years.

433

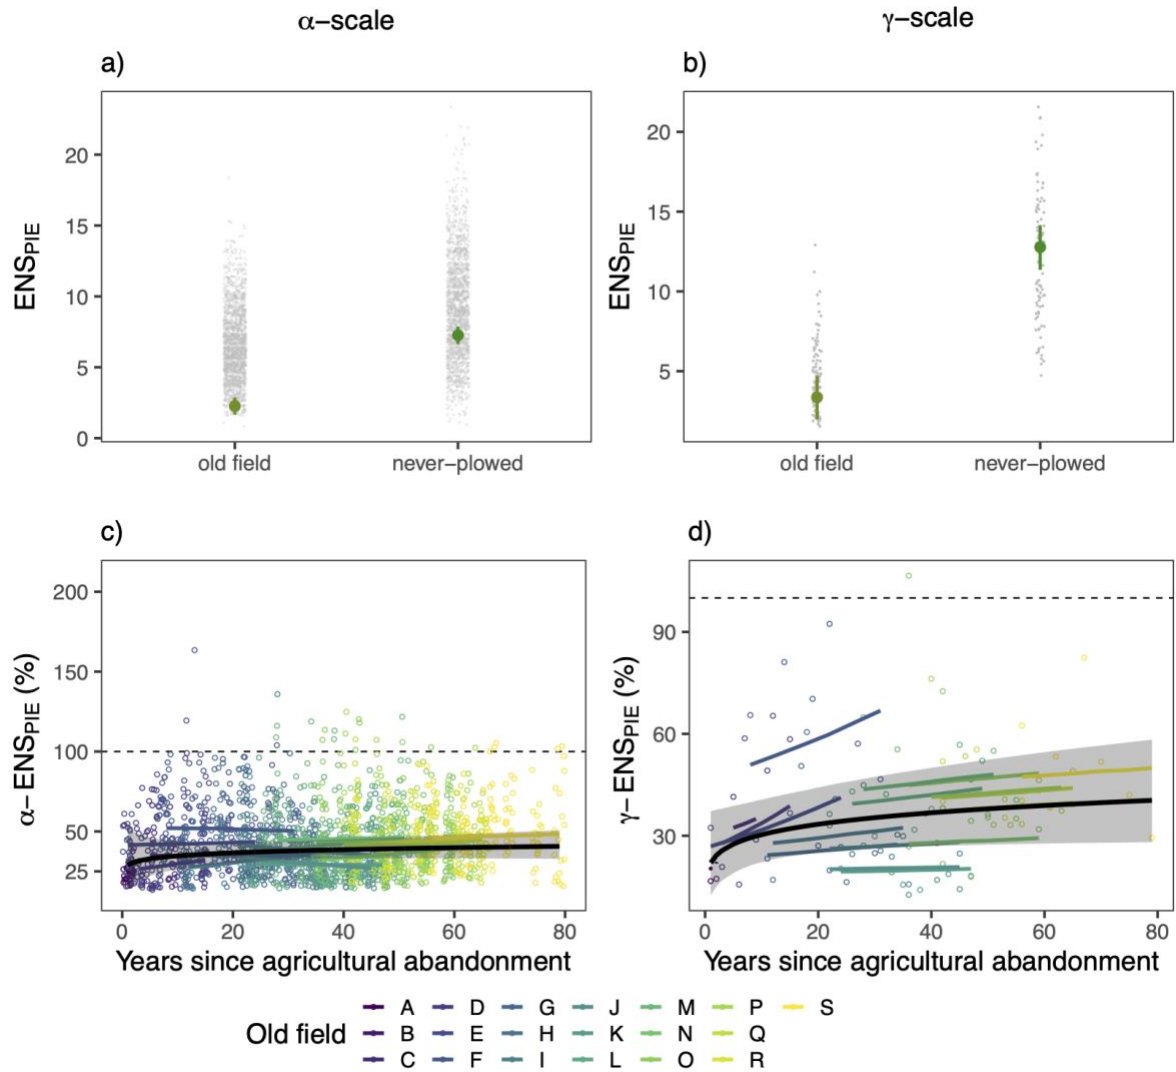

434

435 **Figure 2:  $\alpha$ -scale and  $\gamma$ -scale ENSPIE** a)  $\alpha$ -scale and b)  $\gamma$ -scale ENSPIE as a function  
 436 of site status. Small points show data models were fit to; large points are the  
 437 conditional effects of site status and the lines show the 95% credible intervals of  
 438 conditional effects. c)  $\alpha$ -scale and d)  $\gamma$ -scale species evenness as a function of  
 439 'years since agricultural abandonment'. Black dashed line represents the mean  
 440 diversity metric of all never-ploughed sites (18 sites). The thick black line represents  
 441 the mean fitted line of years since agricultural abandonment on species richness  
 442 across all old-fields. The grey shading around the black line represents the 95%  
 443 credible interval of that mean effect estimate. Each colored line represents the  
 444 average predicted values for each site. Each open point represents an old-field plot  
 445 ( $\alpha$ -scale) or a site ( $\gamma$ -scale) calculated as the percentage of evenness, compared to  
 446 never-ploughed sites. Y-axes vary for clarity.

447

448

449  **$\beta$ -diversity**

450           In the discrete analysis,  $\beta$ -diversity ( $\beta = \gamma/\alpha$ , Whittaker, 1972) values were  
451 82% (3.50, 95% Credible Interval: 3.25 to 3.77) of that found in never-ploughed sites  
452 (4.28, 4.02 to 4.53, Fig. 3a). In the continuous analysis,  $\beta$ -diversity values increased  
453 notably across years since agricultural abandonment (Slope: 0.15, CI: 0.09 to 0.22),  
454 and recovered up to 90% of the heterogeneity of that compared to never-ploughed  
455 sites (Fig. 3b).

456           In the discrete analysis,  $\beta$ -ENS<sub>PIE</sub> values were 82% (1.31, CI: 1.15 to 1.46) of  
457 that found in never-ploughed sites (1.59, CI: 1.45 to 1.75, Fig. 3c). In the continuous  
458 analysis,  $\beta$ -ENS<sub>PIE</sub> did not increase across years since agricultural abandonment  
459 (Slope: 0.10, CI: 0.02 to 0.19, Fig. 3d), and recovered to about 95% of that  
460 compared to never-ploughed sites.

461

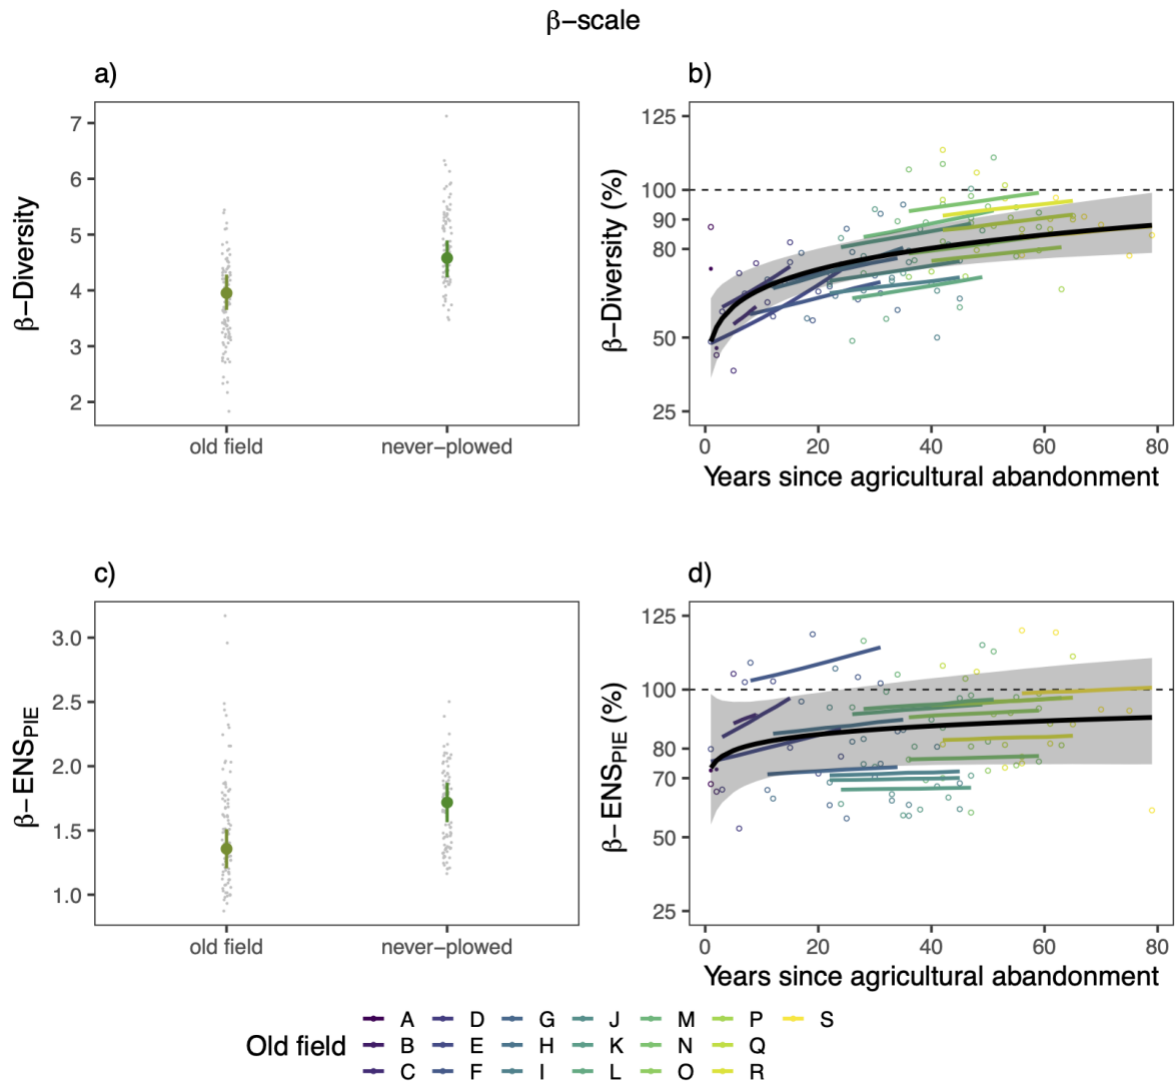

462

463 **Figure 3:** Whittaker's  $\beta$ -Diversity (a, b) and  $\beta$ -ENS<sub>PIE</sub> (c, d). a) & c) as a function of  
 464 site status and b) & d) as a function of 'years since agricultural abandonment'. In a)  
 465 and c) small points show data models were fit to; large points are the conditional  
 466 effects of site status and the lines show the 95% credible intervals of conditional  
 467 effects. In b) and d) the thin black dashed line represents the mean diversity metric  
 468 of all never-ploughed sites (18 sites). The thick black line represents the fitted mean  
 469 line of years since agricultural abandonment on each diversity metric across all old-  
 470 fields. The grey shading around the black line represents the 95% credible interval of  
 471 that mean effect estimate. Each colored line represents the average predicted values  
 472 for each site. Each open point represents an old-field calculated as the percentage of  
 473  $\beta$ -diversity, or  $\beta$ -ENS<sub>PIE</sub> compared to the overall average of never-ploughed sites.  
 474 Each colored line shows the slope of each site across years since agricultural  
 475 abandonment. Y-axes vary for clarity.

476

## 477 **Community Composition**

478       Dissimilarity due to turnover in old-fields compared to the never-ploughed  
479 region decreased across years since abandonment (Slope: -0.02, 95% Credible  
480 Interval: -0.03 to -0.01) (Fig. 4). That is, old-fields were colonised with species that  
481 were unique to old-field sites, when first abandoned, and this decreased over time.  
482 Dissimilarity due to nestedness in old-fields compared to never-ploughed sites  
483 increased across years since abandonment (Slope: 0.01, CI: 0.001 to 0.02) (Fig. 4).  
484 In other words, old-fields were increasingly colonised by species characteristic of the  
485 never-ploughed sites over time since abandonment, but never fully converged. In  
486 total, we found 63 species that occurred only in never-ploughed sites, never in any  
487 old-fields. Conversely, we found 34 species that occur only in old fields, and never in  
488 never-ploughed sites.

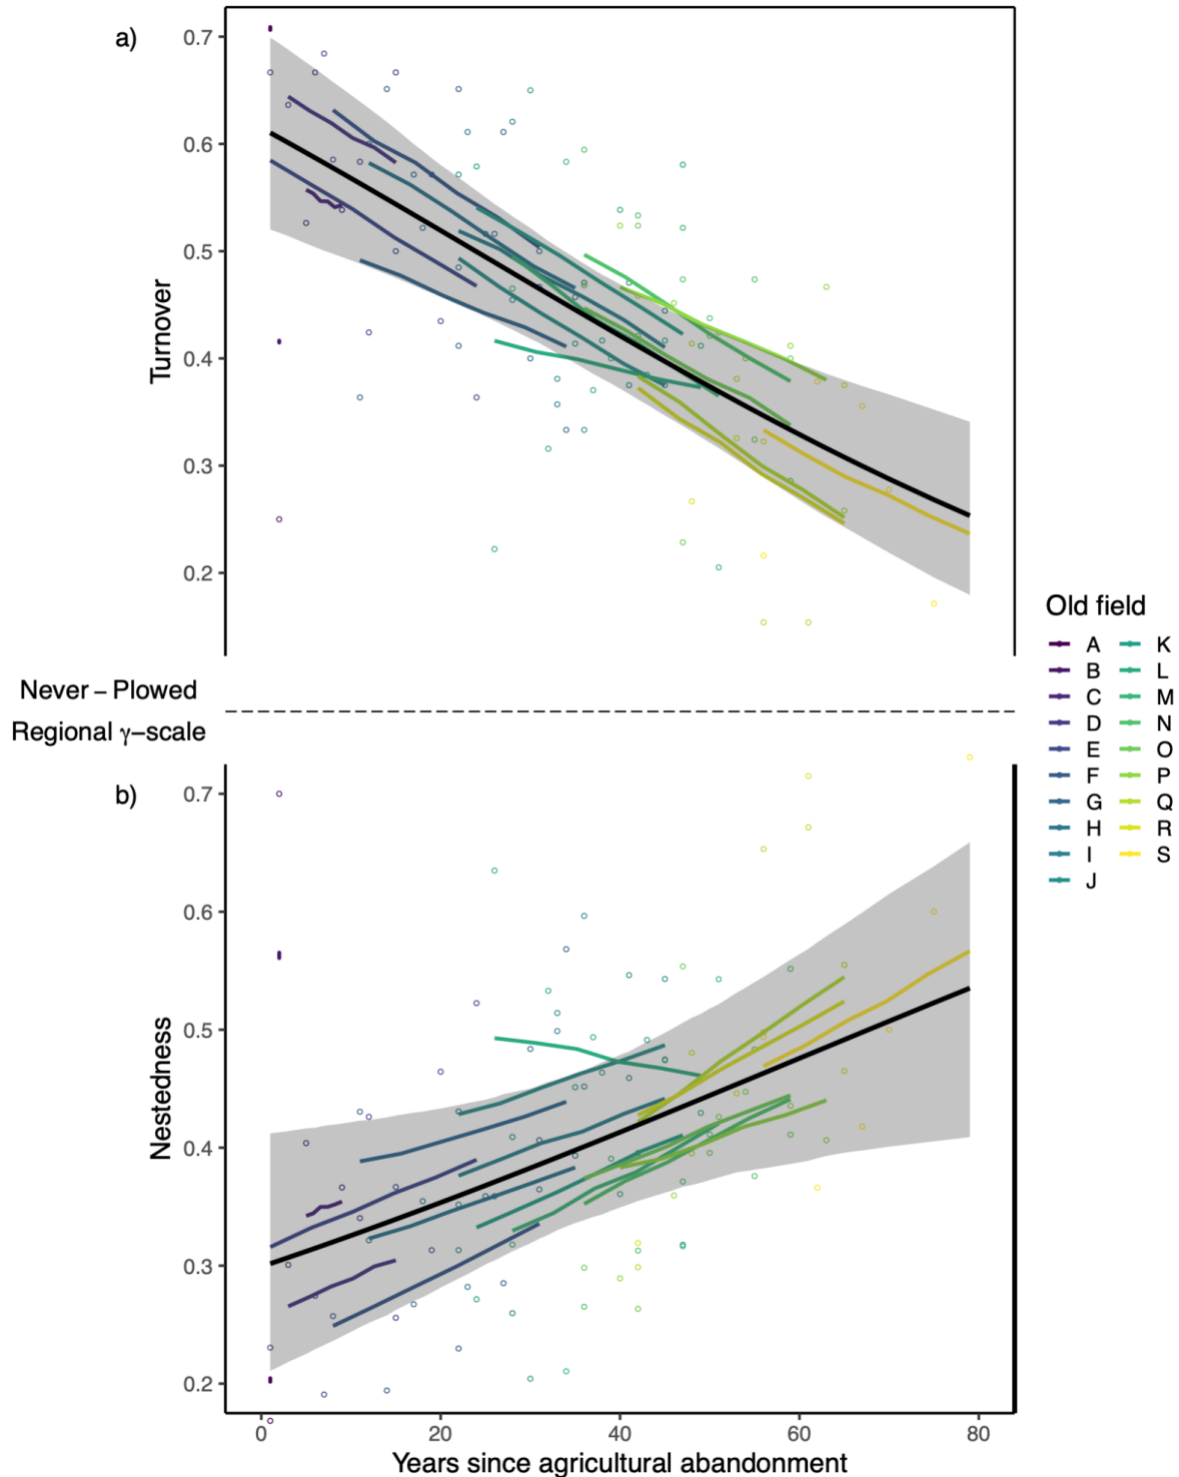

489

490 **Figure 4:** a) Spatial turnover and b) spatial nestedness components of  
491 Jaccard's dissimilarity index as a function of 'years since agricultural abandonment'.  
492 Each old-field at each time point was compared to the regional- $\gamma$  species pool of all  
493 never-ploughed sites. The black dashed line represents a value of zero (0). The thick  
494 black line represents the average effect of years since agricultural abandonment on

495 components across all old-fields compared to never-ploughed sites. The grey  
496 shading around the black line represents the 95% credible interval of that effect  
497 estimate. Each open point represents an old-field at a time since agricultural  
498 abandonment compared to the never-ploughed region. Each colored line shows the  
499 predicted slope of each old-field across years since agricultural abandonment.  
500

### 501 **Growth Form and Origin Cover**

502       Relative cover of growth form groups (graminoid, forb, legume) of differing  
503 origins (i.e., native and introduced) found in never-ploughed fields changed as a  
504 function of years since agricultural abandonment in old fields (Fig. 5). Native  
505 graminoid cover increased during years since agricultural abandonment in many  
506 sites, but the credible intervals overlap zero (Slope: 0.15, CI: -0.50 to 0.85). Both  
507 native forbs (-0.70, CI: -1.15 to -0.27) and native legumes (-1.34, CI: -2.36 to -0.36)  
508 decreased. Introduced graminoid cover increased in many sites since abandonment  
509 but again the credible intervals overlap zero (0.29, CI: -0.12 to 0.67). Both introduced  
510 forbs decreased (-0.57, CI: -0.98 to -0.20) and introduced legumes decreased (-0.10,  
511 CI: -0.86 to 0.56).

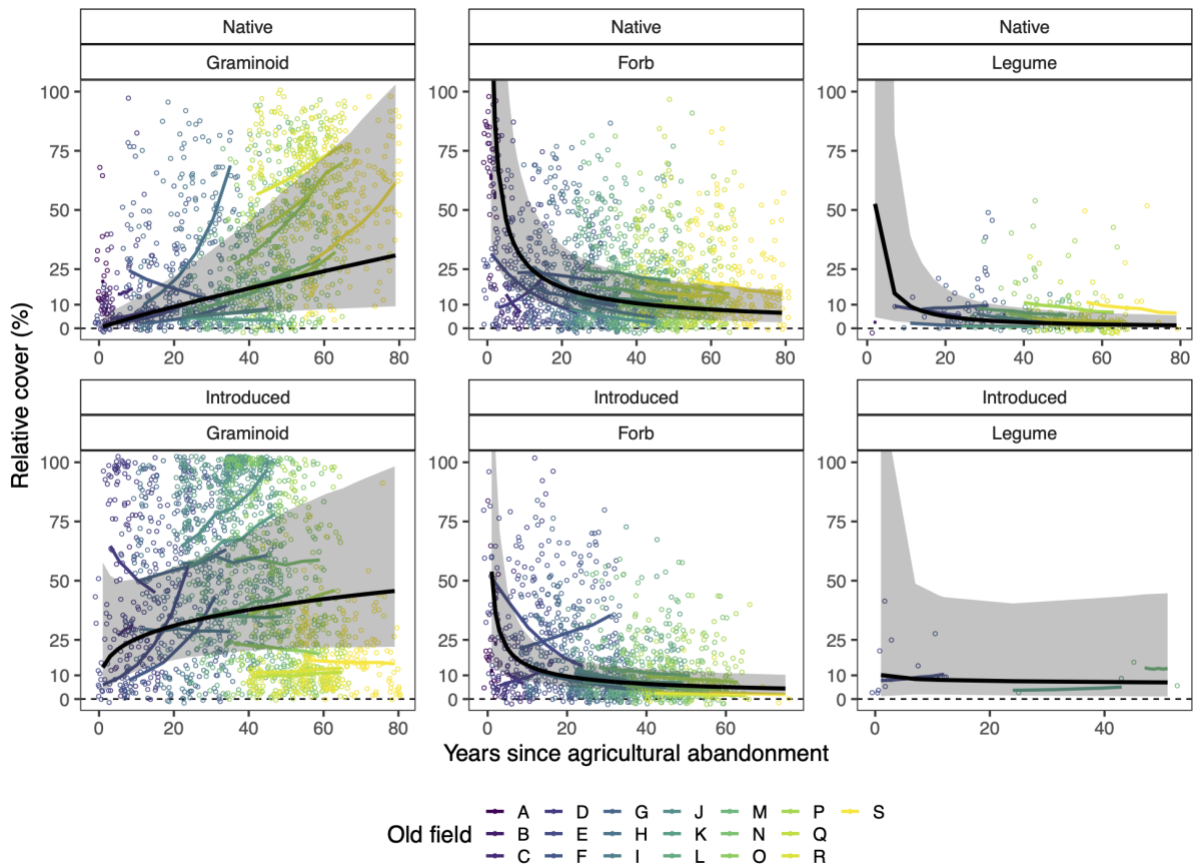

512

513 **Figure 5:** Relative cover of native a) graminoids b) forbs and c) legumes, and  
 514 introduced d) graminoids e) forbs and f) legumes, characteristic of never-ploughed  
 515 sites as a function of 'years since agricultural abandonment'. The thick black line  
 516 represents the average effect of years since agricultural abandonment on species  
 517 growth form and origin groups across all old-fields. The grey shading around the  
 518 black line represents the 95% credible interval of that effect estimate. Each open  
 519 point represents the relative cover of each respective growth form and origin in an  
 520 old-field plot at a time since agricultural abandonment. Each colored line shows the  
 521 predicted slope of each old-field across years since agricultural abandonment for  
 522 each growth form and origin.

523



## 524 Discussion

525 A major tenet in disturbance ecology has been that, given enough time,  
526 removal of major anthropogenic disturbances such as agriculture will allow  
527 biodiversity to recover (Moreno-Mateos et al., 2017). At the same time, accruing  
528 evidence suggests that, in the absence of active restoration interventions (and even  
529 in their presence), this recovery can take an exceedingly long time and is often  
530 incomplete (Buisson et al., 2018; Isbell et al., 2013; Nerlekar & Veldman, 2020). For  
531 example, using many of the same sites as in the present study (see Supplementary  
532 Table 1 for details), Isbell et al. (2019) showed that  $\alpha$ -scale (0.3m<sup>2</sup>) species richness  
533 had recovered to only ~75% of that of the never-ploughed sites even after 91 years  
534 of recovery. Not surprisingly, we found similar results in our  $\alpha$ -scale (0.5 m<sup>2</sup>)  
535 analyses, where within-plot species richness increased slightly through time, but  
536 remained ~70% lower than never-ploughed plots, even after 80 years of recovery  
537 (Fig. 1c). While passive recovery is a nice option given resource constraints, it  
538 carries with it some hidden costs, such as incomplete recovery (Zahawi et al., 2014).  
539 Here, we examine the scale-dependent dynamics of this passive recovery over long-  
540 time scales. Given that active restoration is more expensive upfront, is not silver-  
541 bullet solution (Bekessy et al., 2010), nor is yet predictable (Brudvig & Catano,  
542 2021), perhaps understanding scale-dependent dynamics of passive recovery better  
543 can help point to actionable improvements for restoration.

544 Importantly, coexistence and diversity are highly scale-dependent patterns  
545 and it is less clear how larger-scale patterns of diversity recover. Anthropogenic  
546 disturbances are known to often influence  $\beta$ -diversity in grassland ecosystems, both  
547 positively and negatively (Catano et al., 2017; Eskelinen & Harrison, 2015; Martin et al.,  
548 2005; Polley et al., 2005). As a result, we would either expect exacerbated effects of

549 that driver and recovery at larger spatial scales (if  $\beta$ -diversity is lower) or enhanced  
550 effects of that driver and recovery at larger spatial scales (if  $\beta$ -diversity is higher). We  
551 found that  $\beta$ -diversity was indeed lower than in never-ploughed sites following  
552 agricultural abandonment, and while this diversity showed signs of recovery over  
553 time, it remained lower overall than in the never-ploughed sites. Complementary  
554 results have been found in successional sites that showed heterogeneity among  
555 plots increasing, and across sites decreasing, as succession progressed (S. Li et al.,  
556 2016). Other studies found that fire treatments increased in  $\alpha$ -diversity, while  $\beta$ -  
557 diversity remained unchanged (Joner et al., 2021).

558         Given the lower  $\beta$ -diversity in recovering compared to never-ploughed sites  
559 (Fig 3a), we might expect that the magnitude of the deficit of species richness in  
560 recovered relative to never-ploughed sites might increase with spatial scale. This  
561 was true for the absolute number of species; the deficit in recovering relative to  
562 never-ploughed sites was ~4 species at the  $\alpha$ -scale (Fig. 1a), but ~19 species at the  
563  $\gamma$ -scale (Fig. 1b). But it was not true for the ratio of the deficit; the deficit of species  
564 richness was 59% at the  $\alpha$  scale (Fig. 1a), with a similar recovery deficit of 55% at  
565 the  $\gamma$ -scale (Fig. 1b). In addition, there was little evidence that the deficit in species  
566 richness declined through time over the course of the observations, consistent with  
567 comparable findings and speculations on the slow recovery of secondary grasslands  
568 (Nerlekar & Veldman, 2020).

569         Although we cannot explicitly discern the mechanism underlying the continued  
570 deficit of species richness at  $\alpha$  and  $\gamma$ -scales in these recovering old-fields, we  
571 suspect dispersal limitation between sites might play a key role. Several previous  
572 studies at Cedar Creek have shown that seed additions can lead to significantly  
573 increased levels of species richness (Fargione et al., 2011; Ladouceur et al., 2020;

574 Symstad, 2000; Tilman, 1997). Even seeds added to a never-ploughed prairie-savanna  
575 led to a doubling of  $\alpha$  plant diversity that persisted for 13 years or longer (Catford et  
576 al., 2019; Tilman, 1997). For example, the  $\gamma$ -diversity of Field H recovers rapidly (Fig.  
577 1d), and is located right next to field N which has been recovering after  
578 abandonment for 35 years more than field H (Fig. S1, Table S1). This is evidence for  
579 spatially-dependent dispersal limitation. This is also consistent with our results  
580 comparing the nestedness and turnover components of compositional dissimilarity,  
581 which indicated that species composition in the old-fields was becoming more similar  
582 to the never-ploughed sites over time (Fig. 4), likely through species gains (Foster &  
583 Tilman, 2000). It is also possible that the soils in recovering sites have been  
584 significantly altered by added fertilisers so that environmental filters also play a role  
585 in limiting recovery (Seabloom et al., 2020).

586 By comparing the results of how species richness recovered following  
587 agricultural abandonment to those of  $ENS_{PIE}$ , a diversity metric that strongly weights  
588 the most common species, we can see how patterns of recovery are influenced by  
589 more common versus rare species. In this case,  $ENS_{PIE}$  following agricultural  
590 abandonment recovered to only ~31% of that observed in the never-ploughed sites  
591 at the  $\alpha$ -scale (Fig. 2a). Compared to the ~59% recovery of species richness at the  
592  $\alpha$ -scale (Fig. 1a), this suggests that much of the recovery was among species that  
593 are relatively common in the community and that there is less recovery of community  
594 evenness. At the site scale,  $ENS_{PIE}$  in old-fields recovered to 28% of that in never  
595 disturbed sites (Fig. 2b), compared to the 55% recovery of species richness at the  
596 site scale (Fig. 1b). The higher recovery of species richness than  $ENS_{PIE}$  is also  
597 consistent with previous studies (Martin et al., 2005; Sluis, 2002; Wilsey et al., 2005),

598 suggesting that rarer species drive a lot of the passive recovery in abandoned old-  
599 fields.

600         Despite the fact that measurements of species diversity (richness and  
601 evenness) only partially recovered across scales even after nearly a century of  
602 agricultural abandonment, species composition has consistently recovered through  
603 time (Fig. 4). Early in the time series, recovering old-fields were colonised by species  
604 not typically found in never-ploughed sites. Grass cover characteristic of never-  
605 ploughed fields, both native and exotic, increased in old fields through time, and forb  
606 cover declined, suggesting that some growth forms may predictably recolonise (Clark  
607 et al., 2019), and increase their cover more readily than others (Fig. 5). Similar  
608 studies in other systems that have observed that perhaps species that are the  
609 slowest to recover on their own are less-effective dispersers (Fensham et al., 2016).  
610 Finally, we predict that without intervention, recovery to 95% of reference sites may  
611 take much longer, but this time to recovery may be different for each scale (Fig.  
612 S10). Given that successional recovery has been found to be most successful in  
613 colder, more humid systems (Prach & Walker, 2019), passive recovery, and even  
614 active restoration in more arid and hot systems is expected to be more difficult  
615 (Shackelford, Paterno, et al., 2021).

616         Here, to actively assist recovery, the control of invasive grasses, combined  
617 with direct seeding of native forbs, and management actions (e.g., fire, soil  
618 restoration) may be a favourable action to accelerate the recovery of diversity.  
619 Additionally, focusing restoration treatments on specific native grass and forb  
620 species that have not recovered may help to prioritise resources and actions through  
621 time. Combined with appropriate management actions (Guiden et al., 2021), and  
622 targeted support for trophic relationships (Heelemann et al., 2012; Ladouceur et al.,

623 2022), restoration can also have cascading effects for passively supporting the  
624 recovery of the fauna community structure and function (Pearson et al., 2022).

625 Overall, our results show that analyses of multiple metrics across scales more  
626 fully reveals how ecological communities recover following disturbance in space and  
627 time. To accelerate or assist this recovery, active intervention via restoration may be  
628 considered a viable option. Understanding how biodiversity recovers on its own after  
629 disturbance across space and time can help us to better assist this recovery and  
630 restore systems more effectively and predictably into the future.

631

### 632 **Acknowledgements**

633 We thank the staff, researchers, students, and interns who have worked for more than three  
634 decades to maintain the old field surveys and experiments at Cedar Creek. Data collection  
635 was supported by the NSF LTER program, including DEB- 8114302, DEB- 8811884, DEB-  
636 9411972, DEB-0080382, DEB-0620652, and DEB-1234162, and by the Cedar Creek  
637 Ecosystem Science Reserve and the University of Minnesota. We gratefully acknowledge  
638 the support of the German Centre for Integrative Biodiversity Research (iDiv) Halle-Jena-  
639 Leipzig, funded by the German Research Foundation (DFG–FZT 118, 202548816). We  
640 thank Christian Krause and the UFZ administrative and support staff of the High-  
641 Performance Computing Cluster EVE, a joint effort of the Helmholtz Centre for  
642 Environmental Research (UFZ) and iDiv, for access to, and support associated with, EVE.  
643 EL thanks the Alexander von Humboldt Foundation. Authors declare no conflict of interest.

644

### 645 **Author Contributions**

646 EL, JMC and FI conceived the idea. FI and ATC contributed ideas and suggestions  
647 for data selection, preparation, analysis and interpretation. GDT, PBR and ATC  
648 provided data. EL conducted data analysis. JMC & WSH contributed ideas to  
649 analyses. EL & JMC wrote the manuscript. EL, FI, ATC, WSH, PBR, GDT and JMC  
650 contributed to the shaping of the manuscript, and made edits and suggestions  
651 leading to the final version.

652

### 653 **Data Availability**

654 Data is archived at Cedar Creek Ecosystem Science LTER Reserve Data Catalogue:  
655 <https://www.cedarcreek.umn.edu/research/data> . Data summaries at different scales  
656 needed to reproduce results will be archived at a data repository like DRYAD or  
657 FigShare. Code will be archived at <https://github.com/emma-ladouceur> and  
658 assigned a DOI through Zenodo.

659

## 660 **References**

- 661 Atkinson, J., & Bonser, S. P. (2020). “Active” and “passive” ecological restoration strategies  
662 in meta-analysis. *Restoration Ecology*, 28(5), 1032–1035.  
663 <https://doi.org/10.1111/rec.13229>
- 664 Baselga, A. (2009). Partitioning the turnover and nestedness components of beta diversity.  
665 *Global Ecology and Biogeography*, 19, 134–143. [https://doi.org/10.1111/j.1466-](https://doi.org/10.1111/j.1466-8238.2009.00490.x)  
666 [8238.2009.00490.x](https://doi.org/10.1111/j.1466-8238.2009.00490.x)
- 667 Baselga, A., & Orme, C. D. L. (2012). betapart: An R package for the study of beta diversity.  
668 *Methods in Ecology and Evolution*, 3, 808–812. [https://doi.org/10.1111/j.2041-](https://doi.org/10.1111/j.2041-210x.2012.00224.x)  
669 [210x.2012.00224.x](https://doi.org/10.1111/j.2041-210x.2012.00224.x)
- 670 Bekessy, S. A., Wintle, B. A., Lindenmayer, D. B., McCarthy, M. A., Colyvan, M., Burgman,  
671 M. A., & Possingham, H. P. (2010). The biodiversity bank cannot be a lending bank.  
672 *Conservation Letters*, 3, 151–158. <https://doi.org/10.1111/j.1755-263x.2010.00110.x>
- 673 Brudvig, L. A., & Catano, C. P. (2021). Prediction and uncertainty in restoration science.  
674 *Restoration Ecology*, n/a(n/a), e13380. <https://doi.org/10.1111/rec.13380>
- 675 Buisson, E., Stradic, S. L., Silveira, F. A. O., Durigan, G., Overbeck, G. E., Fidelis, A.,  
676 FERNANDES, G. W., BOND, W. J., Hermann, J.-M., Mahy, G., Alvarado, S. T.,  
677 ZALOUMIS, N. P., & Veldman, J. W. (2018). Resilience and restoration of tropical  
678 and subtropical grasslands, savannas, and grassy woodlands. *Biological Reviews*,  
679 262, 1452–20. <https://doi.org/10.1111/brv.12470>
- 680 Bürkner, P.-C. (2018). Advanced Bayesian Multilevel Modeling with the R Package brms.  
681 *The R Journal*, 10, 395–411. <https://doi.org/10.32614/rj-2018-017>
- 682 Carbutt, C., Henwood, W. D., & Gilfedder, L. A. (2017). Global plight of native temperate  
683 grasslands: Going, going, gone? *Biodiversity and Conservation*, 26(12), 2911–2932.  
684 <https://doi.org/10.1007/s10531-017-1398-5>
- 685 Carpenter, B., Gelman, A., Hoffman, M. D., Lee, D., Goodrich, B., Betancourt, M., Brubaker,  
686 M., Guo, J., Li, P., & Riddell, A. (2017). Stan: A Probabilistic Programming Language.  
687 *Journal of Statistical Software*, 76, 1–32. <https://doi.org/10.18637/jss.v076.i01>

- 688 Catano, C. P., Dickson, T. L., & Myers, J. A. (2017). Dispersal and neutral sampling mediate  
689 contingent effects of disturbance on plant beta-diversity: A meta-analysis. *Ecology*  
690 *Letters*, 20(3), 347–356. <https://doi.org/10.1111/ele.12733>
- 691 Catano, C. P., Grman, E., Behrens, E., & Brudvig, L. A. (2021). Species pool size alters  
692 species–area relationships during experimental community assembly. *Ecology*,  
693 102(1). <https://doi.org/10.1002/ecy.3231>
- 694 Catford, J. A., Smith, A. L., Wragg, P. D., Clark, A. T., Kosmala, M., Cavender-Bares, J.,  
695 Reich, P. B., & Tilman, D. (2019). Traits linked with species invasiveness and  
696 community invasibility vary with time, stage and indicator of invasion in a long-term  
697 grassland experiment. *Ecology Letters*, 22(4), 593–604.  
698 <https://doi.org/10.1111/ele.13220>
- 699 Chao, A., Gotelli, N. J., Hsieh, T. C., Sander, E. L., Ma, K. H., Colwell, R. K., & Ellison, A. M.  
700 (2014). Rarefaction and extrapolation with Hill numbers: A framework for sampling  
701 and estimation in species diversity studies. *Ecological Monographs*, 84, 45–67.  
702 <https://doi.org/10.1890/13-0133.1>
- 703 Chase, J. M., & Knight, T. M. (2013). Scale-dependent effect sizes of ecological drivers on  
704 biodiversity: Why standardised sampling is not enough. *Ecology Letters*, 16, 17–26.  
705 <https://doi.org/10.1111/ele.12112>
- 706 Chase, J. M., McGill, B. J., McGlenn, D. J., May, F., Blowes, S. A., Xiao, X., Knight, T. M.,  
707 Purschke, O., & Gotelli, N. J. (2018). Embracing scale-dependence to achieve a  
708 deeper understanding of biodiversity and its change across communities. *Ecology*  
709 *Letters*, 21, 1737–1751. <https://doi.org/10.1111/ele.13151>
- 710 Chase, J. M., McGill, B. J., Thompson, P. L., Antão, L. H., Bates, A. E., Blowes, S. A.,  
711 Dornelas, M., Gonzalez, A., Magurran, A. E., Supp, S. R., Winter, M., Bjorkman, A.  
712 D., Bruelheide, H., Byrnes, J. E. K., Cabral, J. S., Elahi, R., Gomez, C., Guzman, H.  
713 M., Isbell, F., ... O'Connor, M. (2019). Species richness change across spatial  
714 scales. *Oikos*, 128(8), 1079–1091. <https://doi.org/10.1111/oik.05968>

- 715 Chazdon, R. L., Falk, D. A., Banin, L. F., Wagner, M., J. Wilson, S., Grabowski, R. C., &  
716 Suding, K. N. (2021). The intervention continuum in restoration ecology: Rethinking  
717 the active–passive dichotomy. *Restoration Ecology*.  
718 <https://doi.org/10.1111/rec.13535>
- 719 Clark, A. T., Knops, J. M. H., & Tilman, D. (2019). Contingent factors explain average  
720 divergence in functional composition over 88 years of old field succession. *Journal of*  
721 *Ecology*, 107, 545–558. <https://doi.org/10.1111/1365-2745.13070>
- 722 Díaz, S., Settele, J., Brondízio, E. S., Ngo, H. T., Agard, J., Arneeth, A., Balvanera, P.,  
723 Brauman, K. A., Butchart, S. H. M., Chan, K. M. A., Garibaldi, L. A., Ichii, K., Liu, J.,  
724 Subramanian, S. M., Midgley, G. F., Miloslavich, P., Molnár, Z., Obura, D., Pfaff, A.,  
725 ... Zayas, C. N. (2019). Pervasive human-driven decline of life on Earth points to the  
726 need for transformative change. *Science*, 366(6471).  
727 <https://doi.org/10.1126/science.aax3100>
- 728 Eskelinen, A., & Harrison, S. (2015). Erosion of beta diversity under interacting global  
729 change impacts in a semi-arid grassland. *Journal of Ecology*, 103(2), 397–407.  
730 <https://doi.org/10.1111/1365-2745.12360>
- 731 Fargione, J., Brown, C. S., & Tilman, D. (2011). Community assembly and invasion: An  
732 experimental test of neutral versus niche processes. *Proceedings of the National*  
733 *Academy of Sciences*, 100, 8916–8920. <https://doi.org/10.1073/pnas.1033107100>
- 734 Fensham, R. J., Butler, D. W., Fairfax, R. J., Quintin, A. R., & Dwyer, J. M. (2016). Passive  
735 restoration of subtropical grassland after abandonment of cultivation. *Journal of*  
736 *Applied Ecology*, 53(1), 274–283. <https://doi.org/10.1111/1365-2664.12551>
- 737 Field, R., Hawkins, B. A., Cornell, H. V., Currie, D. J., Diniz-Filho, J. A. F., Guégan, J.-F.,  
738 Kaufman, D. M., Kerr, J. T., Mittelbach, G. G., Oberdorff, T., O'Brien, E. M., & Turner,  
739 J. R. G. (2009). Spatial species-richness gradients across scales: A meta-analysis.  
740 *Journal of Biogeography*, 36(1), 132–147. [https://doi.org/10.1111/j.1365-](https://doi.org/10.1111/j.1365-2699.2008.01963.x)  
741 [2699.2008.01963.x](https://doi.org/10.1111/j.1365-2699.2008.01963.x)



- 742 Foster, B. L., & Tilman, D. (2000). Dynamic and static views of succession: Testing the  
743 descriptive power of the chronosequence approach. *Plant Ecology*, 146(1), 1–10.  
744 <https://doi.org/10.1023/A:1009895103017>
- 745 Funk, J. L. (2021). Revising the trait-based filtering framework to include interacting filters:  
746 Lessons from grassland restoration. *Journal of Ecology*, 109(10), 3466–3472.  
747 <https://doi.org/10.1111/1365-2745.13763>
- 748 Gann, G. D., McDonald, T., Walder, B., Aronson, J., Nelsom, C. R., Jonson, J., Hallett, J. G.,  
749 Eisenberg, C., Guariguata, M. R., Junguo, L., Hua, F., Echeverria, C., Gonzales, E.,  
750 Shaw, N., Decler, K., & Dixon, K. W. (2019). *International Standards for the Practice*  
751 *of Ecological Restoration* (Second Edition). Society for Ecological Restoration (SER).  
752 [https://www.ser.org/page/standards\\_supplement](https://www.ser.org/page/standards_supplement)
- 753 Gossner, M. M., Lewinsohn, T. M., Kahl, T., Grassein, F., Boch, S., Prati, D., Birkhofer, K.,  
754 Renner, S. C., Sikorski, J., Wubet, T., Arndt, H., Baumgartner, V., Blaser, S.,  
755 Blüthgen, N., Börschig, C., Buscot, F., Diekötter, T., Jorge, L. R., Jung, K., ... Allan,  
756 E. (2016). Land-use intensification causes multitrophic homogenization of grassland  
757 communities. *Nature*, 540(7632), 266–269. <https://doi.org/10.1038/nature20575>
- 758 Grman, E., Bassett, T., & Brudvig, L. A. (2015). EDITOR'S CHOICE: Confronting  
759 contingency in restoration: management and site history determine outcomes of  
760 assembling prairies, but site characteristics and landscape context have little effect.  
761 *Journal of Applied Ecology*, 1234–1243. [https://doi.org/10.1111/1365-](https://doi.org/10.1111/1365-2664.12135)  
762 [2664.12135@10.1111/\(ISSN\)1365-2664.EcologicalRestoration](https://doi.org/10.1111/1365-2664.12135)
- 763 Grman, E., & Brudvig, L. A. (2014). Beta diversity among prairie restorations increases with  
764 species pool size, but not through enhanced species sorting. *Journal of Ecology*,  
765 102(4), 1017–1024. <https://doi.org/10.1111/1365-2745.12267>
- 766 Guiden, P. W., Barber, N. A., Blackburn, R., Farrell, A., Fliginger, J., Hosler, S. C., King, R.  
767 B., Nelson, M., Rowland, E. G., Savage, K., Vanek, J. P., & Jones, H. P. (2021).  
768 Effects of management outweigh effects of plant diversity on restored animal

- 769 communities in tallgrass prairies. *Proceedings of the National Academy of Sciences*,  
770 118(5), e2015421118. <https://doi.org/10.1073/pnas.2015421118>
- 771 Hautier, Y., Isbell, F., Borer, E. T., Seabloom, E. W., Harpole, W. S., Lind, E. M.,  
772 MacDougall, A. S., Stevens, C. J., Adler, P. B., Alberti, J., Bakker, J. D., Brudvig, L.  
773 A., Buckley, Y. M., Cadotte, M., Caldeira, M. C., Chaneton, E. J., Chu, C., Daleo, P.,  
774 Dickman, C. R., ... Hector, A. (2018). Local loss and spatial homogenization of plant  
775 diversity reduce ecosystem multifunctionality. *Nature Ecology & Evolution*, 2(1), 50–  
776 56. <https://doi.org/10.1038/s41559-017-0395-0>
- 777 Heelemann, S., Krug, C. B., Esler, K. J., Reisch, C., & Poschod, P. (2012). Pioneers and  
778 Perches-Promising Restoration Methods for Degraded Renosterveld Habitats?  
779 *Restoration Ecology*, 20(1), 18–23. <https://doi.org/10.1111/j.1526-100X.2011.00842.x>
- 780 Hill, J. K., & Hamer, K. C. (2004). Determining impacts of habitat modification on diversity of  
781 tropical forest fauna: The importance of spatial scale. *Journal of Applied Ecology*,  
782 41(4), 744–754. <https://doi.org/10.1111/j.0021-8901.2004.00926.x>
- 783 Hoekstra, J. M., Boucher, T. M., Ricketts, T. H., & Roberts, C. (2004). Confronting a biome  
784 crisis: Global disparities of habitat loss and protection: Confronting a biome crisis.  
785 *Ecology Letters*, 8(1), 23–29. <https://doi.org/10.1111/j.1461-0248.2004.00686.x>
- 786 Hsieh, T.C., K. H. Ma, & Anne Chao. (2020). *INEXT: iNterpolation and EXTrapolation for*  
787 *species diversity*. (2.0.20). Comprehensive R Archive Network (CRAN);  
788 <https://CRAN.R-project.org/package=iNEXT>.  
789 <http://chao.stat.nthu.edu.tw/wordpress/software-download/>
- 790 Hulbert, S. H. (1971). The non-concept of species diversity: A critique and alternative  
791 parameters. *Ecology*, 2, 577–586. <https://doi.org/10.2307/1934145>
- 792 Inouye, R. S., Huntly, N. J., Tilman, D., Tester, J. R., Stillwell, M., & Zinnel, K. C. (1987).  
793 Old-Field Succession on a Minnesota Sand Plain. *Ecology*, 68(1), 12–26.  
794 <https://doi.org/10.2307/1938801>

- 795 Isbell, F., Tilman, D., Polasky, S., Binder, S., & Hawthorne, P. (2013). Low biodiversity state  
796 persists two decades after cessation of nutrient enrichment. *Ecology Letters*, 16(4),  
797 454–460. <https://doi.org/10.1111/ele.12066>
- 798 Isbell, F., Tilman, D., Reich, P. B., & Clark, A. T. (2019). Deficits of biodiversity and  
799 productivity linger a century after agricultural abandonment. *Nature Ecology &*  
800 *Evolution*, 3(11), 1533–1538. <https://doi.org/10.1038/s41559-019-1012-1>
- 801 Janišová, M., Michalcová, D., Bacaro, G., & Ghisla, A. (2014). Landscape effects on  
802 diversity of semi-natural grasslands. *Agriculture, Ecosystems & Environment*, 182,  
803 47–58. <https://doi.org/10.1016/j.agee.2013.05.022>
- 804 Joner, F., Giehl, E. L. H., & Pillar, V. D. (2021). Functional and taxonomic alpha and beta  
805 diversity responses to burning grasslands in southern Brazil. *Journal of Vegetation*  
806 *Science*, 32(4), e13060. <https://doi.org/10.1111/jvs.13060>
- 807 Jones, H. P., Jones, P. C., Barbier, E. B., Blackburn, R. C., Benayas, J. M. R., Holl, K. D.,  
808 McCrackin, M., Meli, P., Montoya, D., & Mateos, D. M. (2018). Restoration and repair  
809 of Earth's damaged ecosystems. *Proceedings. Biological Sciences*, 285, 20172577  
810 8. <https://doi.org/10.1098/rspb.2017.2577>
- 811 Jost, L. (2006). Entropy and diversity. *Oikos*, 113, 363-375.
- 812 Kaul, A. D., & Wilsey, B. J. (2021). Exotic species drive patterns of plant species diversity in  
813 93 restored tallgrass prairies. *Ecological Applications*, 31(2), e2252.  
814 <https://doi.org/10.1002/eap.2252>
- 815 Ladouceur, E., Harpole, W. S., Blowes, S. A., Roscher, C., Auge, H., Seabloom, E. W., &  
816 Chase, J. M. (2020). Reducing dispersal limitation via seed addition increases  
817 species richness but not above-ground biomass. *Ecology Letters*.  
818 <https://doi.org/10.1111/ele.13566>
- 819 Ladouceur, E., McGowan, J., Huber, P., Possingham, H., Scridel, D., van Klink, R.,  
820 Poschlod, P., Cornelissen, J. H. C., Bonomi, C., & Jiménez-Alfaro, B. (2022). An  
821 objective-based prioritization approach to support trophic complexity through

- 822 ecological restoration species mixes. *Journal of Applied Ecology*, 59(2), 394–407.  
823 <https://doi.org/10.1111/1365-2664.13943>
- 824 Li, S., Cadotte, M. W., Meiners, S. J., Pu, Z., Fukami, T., & Jiang, L. (2016). Convergence  
825 and divergence in a long-term old-field succession: The importance of spatial scale  
826 and species abundance. *Ecology Letters*, 19(9), 1101–1109.  
827 <https://doi.org/10.1111/ele.12647>
- 828 Li, W., Hooper, D. U., Wu, L., Bakker, J. D., Gianuca, A. T., Wu, X. B., Taube, F., Wang, C.,  
829 & Bai, Y. (2021). Grazing regime alters plant community structure via patch-scale  
830 diversity in semiarid grasslands. *Ecosphere*, 12(6), e03547.  
831 <https://doi.org/10.1002/ecs2.3547>
- 832 Marion, Z. H., Fordyce, J. A., & Fitzpatrick, B. M. (2017). Pairwise beta diversity resolves an  
833 underappreciated source of confusion in calculating species turnover. *Ecology*, 98,  
834 933–939. <https://doi.org/10.1002/ecy.1753>
- 835 Martin, L. M., Moloney, K. A., & Wilsey, B. J. (2005). An Assessment of Grassland  
836 Restoration Success Using Species Diversity Components. *Journal of Applied  
837 Ecology*, 42(2), 327–336.
- 838 Matthews, T. J., Triantis, K. A., & Whittaker, R. J. (Eds.). (2021). *The Species–Area  
839 Relationship: Theory and Application*. Cambridge University Press; Cambridge Core.  
840 <https://doi.org/10.1017/9781108569422>
- 841 MHAPO. (2015). *Minnesota historical aerial photographs online*.  
842 <https://www.lib.umn.edu/apps/mhapo/>
- 843 Moreno-Mateos, D., Barbier, E. B., Jones, P. C., Jones, H. P., Aronson, J., López-López, J.  
844 A., McCrackin, M. L., Meli, P., Montoya, D., & Benayas, J. M. R. (2017).  
845 Anthropogenic ecosystem disturbance and the recovery debt. *Nature  
846 Communications*, 8, 14163. <https://doi.org/10.1038/ncomms14163>
- 847 Murphy, G. E. P., & Romanuk, T. N. (2014). A meta-analysis of declines in local species  
848 richness from human disturbances. *Ecology and Evolution*, 4(1), 91–103.  
849 <https://doi.org/10.1002/ece3.909>

- 850 Nerlekar, A. N., & Veldman, J. W. (2020). High plant diversity and slow assembly of old-  
851 growth grasslands. *Proceedings of the National Academy of Sciences*, 117(31),  
852 18550–18556. <https://doi.org/10.1073/pnas.1922266117>
- 853 Newbold, T., Hudson, L. N., Hill, S. L. L., Contu, S., Lysenko, I., Senior, R. A., Börger, L.,  
854 Bennett, D. J., Choimes, A., Collen, B., Day, J., De Palma, A., Díaz, S., Echeverria-  
855 Londoño, S., Edgar, M. J., Feldman, A., Garon, M., Harrison, M. L. K., Alhusseini, T.,  
856 ... Purvis, A. (2015). Global effects of land use on local terrestrial biodiversity.  
857 *Nature*, 520, 45–50.
- 858 Oksanen, J., Blanchet, G., Friendly, M., Kindt, R., Legendre, P., McGlenn, D., Minchin, P.,  
859 OHara, R. B., Simpson, G., Solymos, P., Stevens, M. H., Szoecs, E., & Wagner, H.  
860 (2019). *vegan: Community Ecology Package* (R package version 2.5-6).  
861 <https://CRAN.R-project.org/package=vegan>
- 862 Passy, S. I., & Blanchet, F. G. (2007). Algal communities in human-impacted stream  
863 ecosystems suffer beta-diversity decline. *Diversity and Distributions*, 13(6), 670–679.  
864 <https://doi.org/10.1111/j.1472-4642.2007.00361.x>
- 865 Pearson, D. E., Ortega, Y. K., Cimino, H. E., Mummy, D. L., & Ramsey, P. W. (2022). Does  
866 active plant restoration passively restore native fauna community structure and  
867 function? *Restoration Ecology*, 30(1), e13481. <https://doi.org/10.1111/rec.13481>
- 868 Pierce, R. L. (1954). *Vegetation cover types and land use history of the Cedar Creek Natural*  
869 *History Reservation, Anoka and Isanti counties*. University of Minnesota.
- 870 Polley, H. W., Derner, J. D., & Wilsey, B. J. (2005). Patterns of Plant Species Diversity in  
871 Remnant and Restored Tallgrass Prairies. *Restoration Ecology*, 13(3), 480–487.  
872 <https://doi.org/10.1111/j.1526-100X.2005.00060.x>
- 873 Prach, K., & Walker, L. R. (2019). Differences between primary and secondary plant  
874 succession among biomes of the world. *Journal of Ecology*, 107(2), 510–516.  
875 <https://doi.org/10.1111/1365-2745.13078>

- 876 Rey Benayas, J. M., Newton, A. C., Diaz, A., & Bullock, J. M. (2009). Enhancement of  
877 Biodiversity and Ecosystem Services by Ecological Restoration: A Meta-Analysis.  
878 *Science*, 325.
- 879 Roch, L., & Jaeger, J. A. G. (2014). Monitoring an ecosystem at risk: What is the degree of  
880 grassland fragmentation in the Canadian Prairies? *Environmental Monitoring and*  
881 *Assessment*, 186(4), 2505–2534. <https://doi.org/10.1007/s10661-013-3557-9>
- 882 Rosenzweig, M. L. (1995). *Species Diversity in Space and Time*. Cambridge University  
883 Press; Cambridge Core. <https://doi.org/10.1017/CBO9780511623387>
- 884 Sax, D. F., & Gaines, S. D. (2003). Species diversity: From global decreases to local  
885 increases. *Trends in Ecology & Evolution*, 18(11), 561–566.  
886 [https://doi.org/10.1016/S0169-5347\(03\)00224-6](https://doi.org/10.1016/S0169-5347(03)00224-6)
- 887 Scholtz, R., & Twidwell, D. (2022). The last continuous grasslands on Earth: Identification  
888 and conservation importance. *Conservation Science and Practice*, 4(3), e626.  
889 <https://doi.org/10.1111/csp2.626>
- 890 Seabloom, E. W., Borer, E. T., & Tilman, D. (2020). Grassland ecosystem recovery after soil  
891 disturbance depends on nutrient supply rate. *Ecology Letters*, 23(12), 1756–1765.  
892 <https://doi.org/10.1111/ele.13591>
- 893 Shackelford, N., Dudney, J., Stueber, M. M., Temperton, V. M., & Suding, K. L. (2021).  
894 Measuring at all scales: Sourcing data for more flexible restoration references.  
895 *Restoration Ecology*, n/a(n/a), e13541. <https://doi.org/10.1111/rec.13541>
- 896 Shackelford, N., Paterno, G. B., Winkler, D. E., Erickson, T. E., Leger, E. A., Svejcar, L. N.,  
897 Breed, M. F., Faist, A. M., Harrison, P. A., Curran, M. F., Guo, Q., Kirmer, A., Law, D.  
898 J., Mganga, K. Z., Munson, S. M., Porensky, L. M., Quiroga, R. E., Török, P.,  
899 Wainwright, C. E., ... Suding, K. L. (2021). Drivers of seedling establishment success  
900 in dryland restoration efforts. *Nature Ecology & Evolution*, 1–8.  
901 <https://doi.org/10.1038/s41559-021-01510-3>
- 902 Simpson, E. H. (1949). Measurement of Diversity. *Nature*, 163(4148), 688–688.  
903 <https://doi.org/10.1038/163688a0>

- 904 Sluis, W. J. (2002). Patterns of Species Richness and Composition in Re-Created  
905 Grassland. *Restoration Ecology*, 10(4), 677–684. <https://doi.org/10.1046/j.1526->  
906 100X.2002.01048.x
- 907 Smith, B., & Wilson, J. B. (1996). A Consumer's Guide to Evenness Indices. *Oikos*, 76(1),  
908 70–82. <https://doi.org/10.2307/3545749>
- 909 Socolar, J. B., Gilroy, J. J., Kunin, W. E., & Edwards, D. P. (2016). How Should Beta-  
910 Diversity Inform Biodiversity Conservation? *Trends in Ecology & Evolution*, 31, 67–  
911 80. <https://doi.org/10.1016/j.tree.2015.11.005>
- 912 Symstad, A. J. (2000). A Test of the Effects of Functional Group Richness and Composition  
913 on Grassland Invasibility. *Ecology*, 81(1), 99–109. <https://doi.org/10.1890/0012->  
914 9658(2000)081[0099:ATOTEO]2.0.CO;2
- 915 Temperton, V. M., Hobbs, R. J., Nuttle, T., & Halle, S. (Eds.). (2004). *Assembly Rules and*  
916 *Restoration Ecology*. Island Press.
- 917 Tilman, D. (1987). Secondary Succession and the Pattern of Plant Dominance Along  
918 Experimental Nitrogen Gradients. *Ecological Monographs*, 57(3), 189–214.  
919 <https://doi.org/10.2307/2937080>
- 920 Tilman, D. (1994). Competition and Biodiversity in Spatially Structured Habitats. *Ecology*,  
921 75(1), 2–16. <https://doi.org/10.2307/1939377>
- 922 Tilman, D. (1997). Community invasibility, recruitment limitation and grassland biodiversity.  
923 *Ecology*, 78(1), 81–92. <https://doi.org/10.1890/0012->  
924 9658(1997)078[0081:CIRLAG]2.0.CO;2
- 925 Uchida, K., Koyanagi, T. F., Matsumura, T., & Koyama, A. (2018). Patterns of plant diversity  
926 loss and species turnover resulting from land abandonment and intensification in  
927 semi-natural grasslands. *Journal of Environmental Management*, 218, 622–629.  
928 <https://doi.org/10.1016/j.jenvman.2018.04.059>
- 929 UNEA. (2019, March 1). *New UN Decade on Ecosystem Restoration offers unparalleled*  
930 *opportunity for job creation, food security and addressing climate change* [Press  
931 Release]. United Nations Environment Agency (UNEA).

- 932 [https://www.unenvironment.org/news-and-stories/press-release/new-un-decade-](https://www.unenvironment.org/news-and-stories/press-release/new-un-decade-ecosystem-restoration-offers-unparalleled-opportunity)  
933 [ecosystem-restoration-offers-unparalleled-opportunity](https://www.unenvironment.org/news-and-stories/press-release/new-un-decade-ecosystem-restoration-offers-unparalleled-opportunity)
- 934 Vellend, M., Verheyen, K., Flinn, K. M., Jacquemyn, H., Kolb, A., Van Calster, H., Peterken,  
935 G., Graae, B. J., Bellemare, J., Honnay, O., Brunet, J., Wulf, M., Gerhardt, F., &  
936 Hermy, M. (2007). Homogenization of forest plant communities and weakening of  
937 species–environment relationships via agricultural land use. *Journal of Ecology*,  
938 95(3), 565–573. <https://doi.org/10.1111/j.1365-2745.2007.01233.x>
- 939 Whittaker, R. H. (1972). Evolution and Measurement of Species Diversity. *TAXON*, 21(2–3),  
940 213–251. <https://doi.org/10.2307/1218190>
- 941 Wickham, H., Averick, M., Bryan, J., Chang, W., McGowan, L., François, R., Golemund, G.,  
942 Hayes, A., Henry, L., Hester, J., Kuhn, M., Pedersen, T., Miller, E., Bache, S., Müller,  
943 K., Ooms, J., Robinson, D., Seidel, D., Spinu, V., ... Yutani, H. (2019). Welcome to  
944 the Tidyverse. *Journal of Open Source Software*, 4(43), 1686.  
945 <https://doi.org/10.21105/joss.01686>
- 946 Williams, C. B. (1964). Patterns in the balance of nature and related problems of quantitative  
947 ecology. *Patterns in the Balance of Nature and Related Problems of Quantitative*  
948 *Ecology*. <https://www.cabdirect.org/cabdirect/abstract/19640603478>
- 949 Wilsey, B. J., Martin, L. M., & Polley, H. W. (2005). Predicting Plant Extinction Based on  
950 Species-Area Curves in Prairie Fragments with High Beta Richness. *Conservation*  
951 *Biology*, 19, 1835–1841. <https://doi.org/10.1111/j.1523-1739.2005.00250.x>
- 952 Young, T. P., Stuble, K. L., Balachowski, J. A., & Werner, C. M. (2017). Using priority effects  
953 to manipulate competitive relationships in restoration. *Restoration Ecology*, 25(S2),  
954 S114–S123. <https://doi.org/10.1111/rec.12384>
- 955 Zahawi, R. A., Reid, J. L., & Holl, K. D. (2014). Hidden Costs of Passive Restoration.  
956 *Restoration Ecology*, 22(3), 284–287. <https://doi.org/10.1111/rec.12098>
- 957 Zirbel, C. R., & Brudvig, L. A. (2020). Trait–environment interactions affect plant  
958 establishment success during restoration. *Ecology*, 101(3), e02971.  
959 <https://doi.org/10.1002/ecy.2971>



960

961

962
